# Supplementary material
Source: MDPI journal article supplement (https://www.mdpi.com/2079-6412/11/11/1410)
Supplement: s1 [file s1]

## Article

# Supplementary Materials: Physicochemical Investigation of Biosynthesis of a Protein Coating on Glass That Promotes Mammalian Cell Growth Using *Lactobacillus rhamnosus* GG Bacteria

Kamil Kaminski \*, Karolina Syrek, Joanna Grudzień, Magdalena Obloza, Monika Adamczyk and Grzegorz D. Sulka

Faculty of Chemistry, Jagiellonian University, Gronostajowa 2 Street, 30-387 Krakow, Poland; syrek@chemia.uj.edu.pl (K.S.); grudzien@chemia.uj.edu.pl (J.G.); obloza@chemia.uj.edu.pl (M.O.); monika1.adamczyk@student.uj.edu.pl (M.A.); sulka@chemia.uj.edu.pl (G.D.S.)

\* Correspondence: kaminski@chemia.uj.edu.pl; Tel.: +48-660589819

**Citation:** Kaminski, K.; Syrek, K.; Grudzień, J.; Obloza, M.; Adamczyk, M.; Sulka, G.D. Physicochemical Investigation of Biosynthesis of a Protein Coating on Glass That Promotes Mammalian Cell Growth Using *Lactobacillus rhamnosus* GG Bacteria. *Coatings* **2021**, *11*, 1410. <https://doi.org/10.3390/coatings11111410>

Academic Editor: Micheline Catauro

Received: 29 October 2021 Accepted: 18 November 2021 Published: date

**Publisher's Note:** MDPI stays neutral with regard to jurisdictional claims in published maps and institutional affiliations.

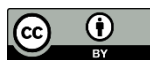

**Copyright:** © 2021 by the authors. Submitted for possible open access publication under the terms and conditions of the Creative Commons Attribution (CC BY) license (<https://creativecommons.org/licenses/by/4.0/>).

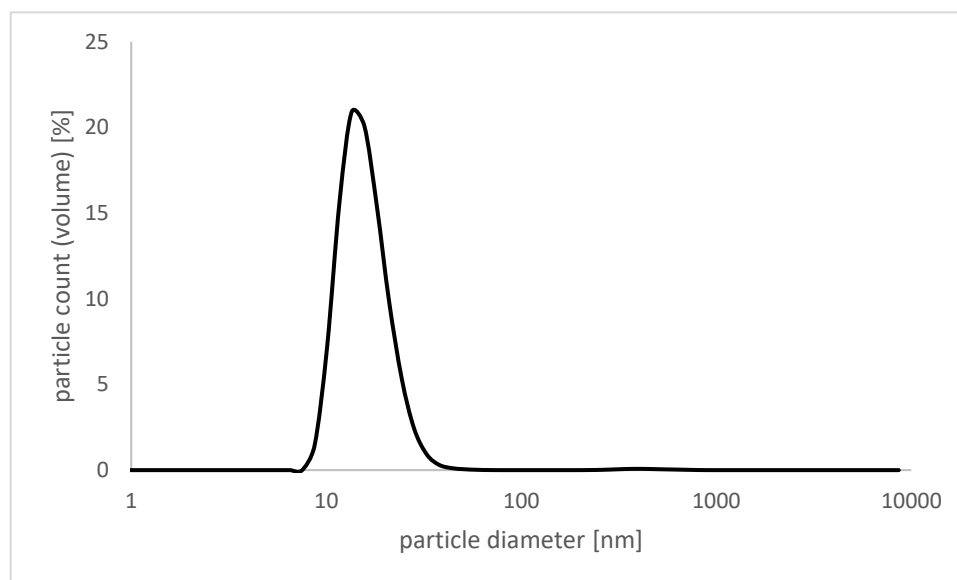

**Figure S1:** Size distribution of commercial gold nanoparticles (Sigma) after 4-fold dilution with physiological PBS (pH = 7.4) based on DLS measurements.

**Table S1.** Absorbance of crystal violet in destaining solutions used for assessment of the amount of bacteria at the tested surfaces.

|                                                                                              | G       | GSHGG   | GSHAuGG |
|----------------------------------------------------------------------------------------------|---------|---------|---------|
| Sample surface area [cm <sup>2</sup> ]                                                       | 0.400   | 0.480   | 0.550   |
| Directly measured absorbance of dye bound to bacteria                                        | 0.092   | 0.111   | 0.255   |
| Signal expressed per 1 cm <sup>2</sup> after subtracting the signal for the unmodified glass | 0.00000 | 0.00125 | 0.23364 |
| increment                                                                                    | –       | –       | 186.91  |
